# Supplementary material for: Synthesis, structure and magnetic properties of two bis(oxalato)cuprate(ii) salts with pyridinium type counter ions
Source: Royal Society of Chemistry journal article supplement (doi:10.1039/d2ce01513g), 2022-12-16
Supplement: d2ce01513g1.pdf [file d2ce01513g1.pdf]

## Supplementary material

### Synthesis, Structure and Magnetic Properties of Two Bis(oxalato)cuprate(II) Salts with Pyridinium Type Counter Ions

Cyrielle L.F. Dazem, A. Ken Inge, Dominique Luneau, Lars Öhrström, and Justin Nenwa

|                                                                                                                                                                                                                                                                                                                                                                                                      |   |
|------------------------------------------------------------------------------------------------------------------------------------------------------------------------------------------------------------------------------------------------------------------------------------------------------------------------------------------------------------------------------------------------------|---|
| <b>Fig. S1</b> Cu-NRH <sub>2</sub> distances found in the CSD ( $r < 10\%$ , no errors and no disorder) .....                                                                                                                                                                                                                                                                                        | 2 |
| <b>Fig. S2</b> IR spectra of left: <b>1</b> and right: <b>2</b> .....                                                                                                                                                                                                                                                                                                                                | 2 |
| <b>Fig. S3</b> UV-vis spectra of left: <b>1</b> and right: <b>2</b> . .....                                                                                                                                                                                                                                                                                                                          | 2 |
| <b>Fig. S4</b> Experimental and simulated PXRD spectra of left: <b>1</b> and right: <b>2</b> .....                                                                                                                                                                                                                                                                                                   | 3 |
| <b>Fig. S5</b> EDS spectra of left <b>1</b> and right <b>2</b> .....                                                                                                                                                                                                                                                                                                                                 | 3 |
| <b>Fig. S6</b> Top: TGA and DSC of <b>1</b> and <b>2</b> . Bottom PXRD patterns of TGA residuals after heating to 800°C (in red) of left <b>1</b> and right <b>2</b> compared to the expected residual product CuO (in blue).....                                                                                                                                                                    | 3 |
| <b>Fig. S7</b> . The zigzag Cu(II) chain that runs along the crystallographic z-axis, Cu...Cu = 5.348 Å, in C <sub>13</sub> H <sub>16</sub> N <sub>2</sub> [Cu(C <sub>2</sub> O <sub>4</sub> ) <sub>2</sub> ] <b>2</b> .....                                                                                                                                                                         | 4 |
| <b>Fig. S8</b> . The opposite charges (red for the pyridinium cation and blue for the complex anion) form a kind of chess board pattern in the xy-plane in C <sub>13</sub> H <sub>16</sub> N <sub>2</sub> [Cu(C <sub>2</sub> O <sub>4</sub> ) <sub>2</sub> ] ( <b>2</b> ) shown by a space filling model. The other way to think about the organisation in the xy-plane is weak hydrogen bonds. .... | 4 |
| <b>Fig. S9</b> . Scanning electron microscopy of <b>1</b> and <b>2</b> (Cu-1 and Cu-2). .....                                                                                                                                                                                                                                                                                                        | 4 |

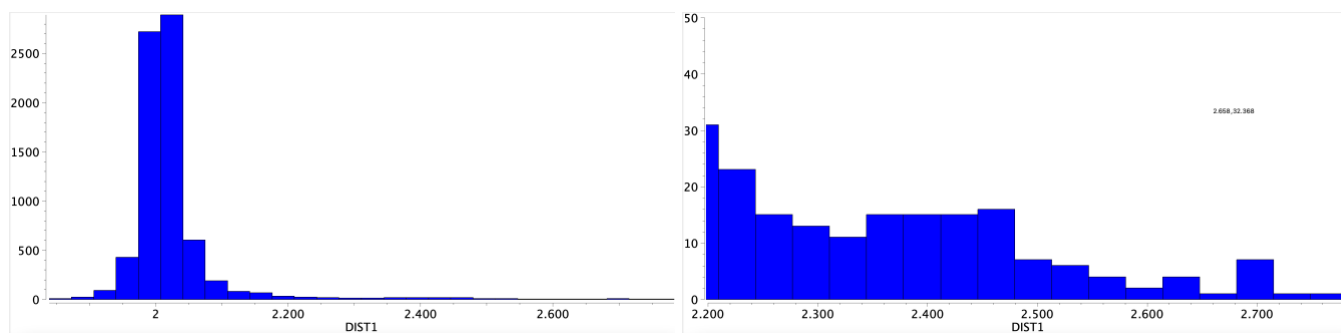

Fig. S1 Cu-NRH<sub>2</sub> distances found in the CSD ( $r < 10\%$ , no errors and no disorder)

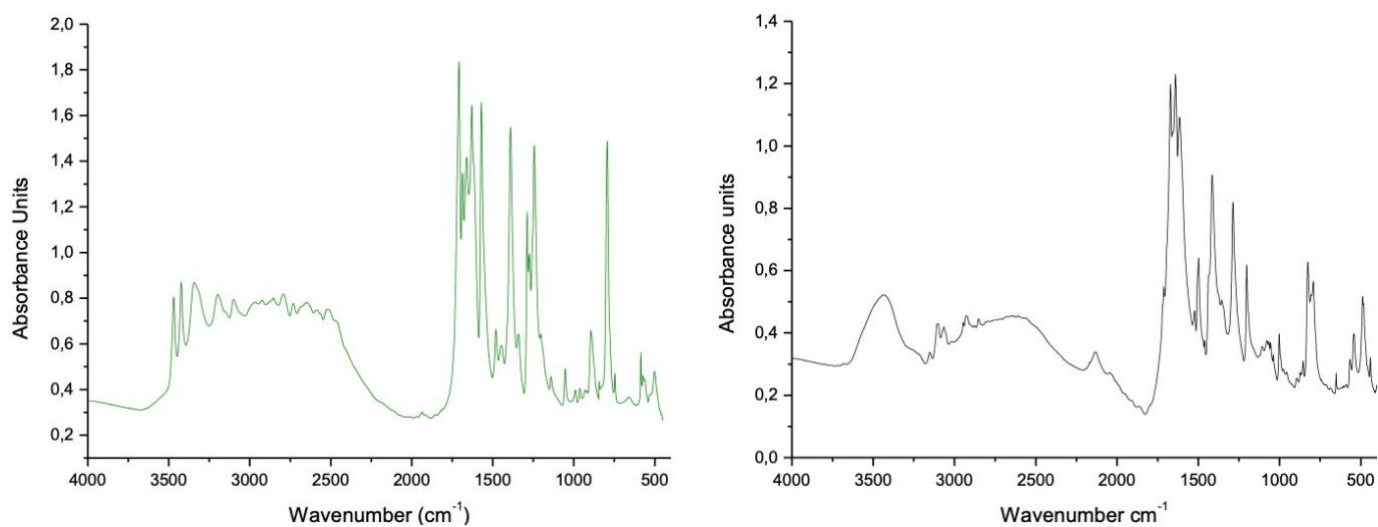

Fig. S2 IR spectra of left: 1 and right: 2.

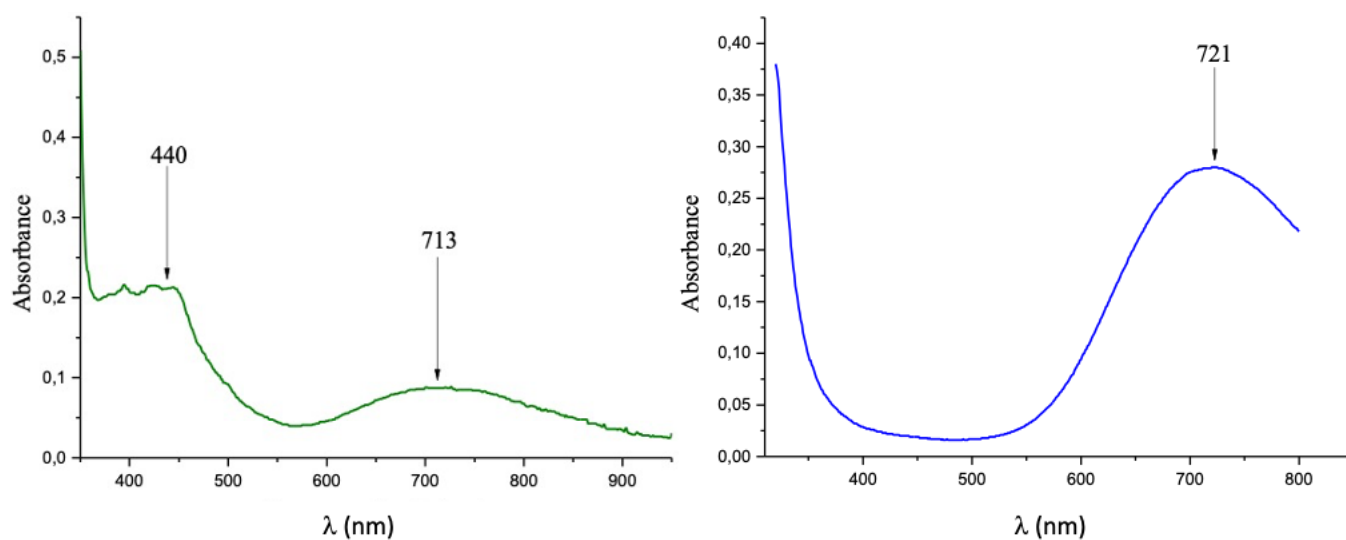

Fig. S3 UV-vis spectra of left: 1 and right: 2.

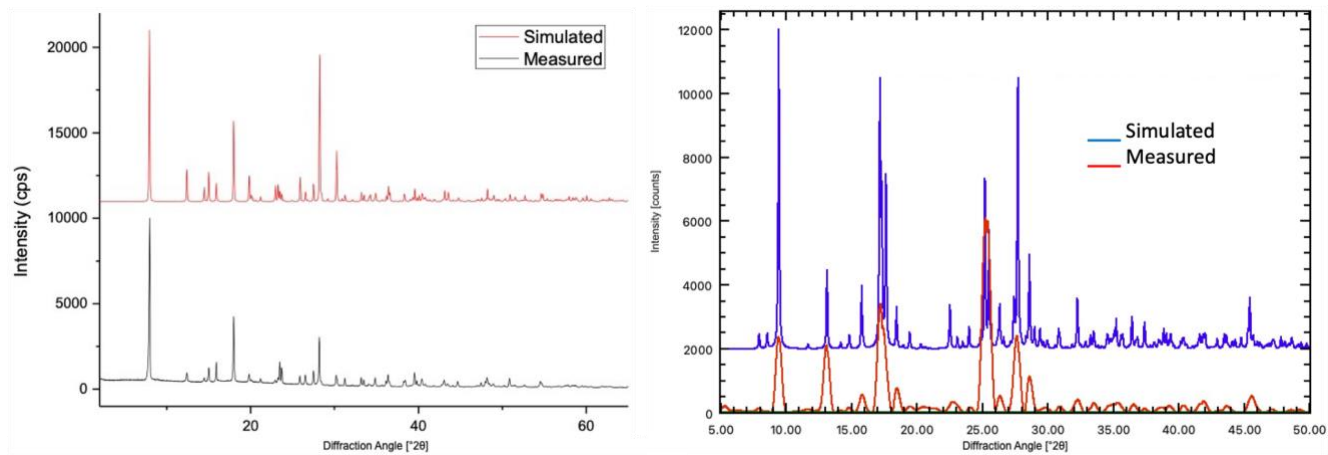

Fig. S4 Experimental and simulated PXRD spectra of left: **1** and right: **2**.

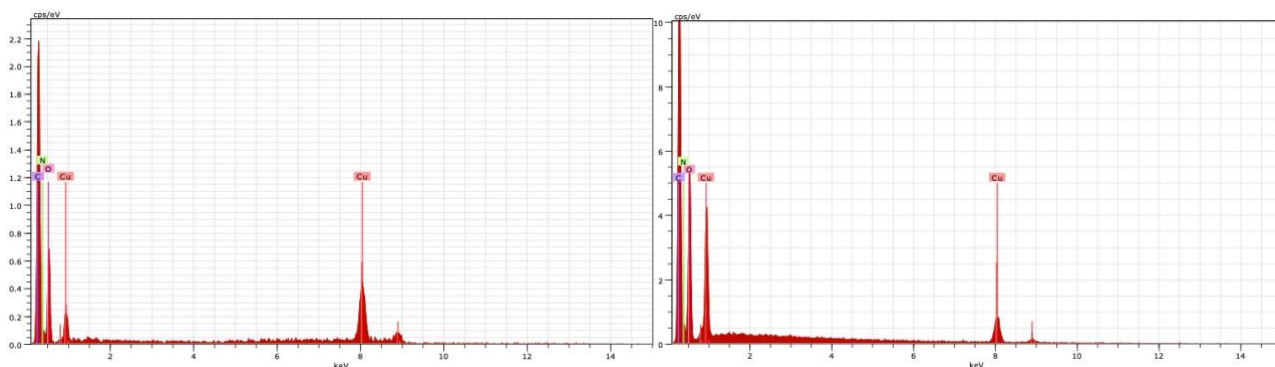

Fig. S5 EDS spectra of left **1** and right **2**.

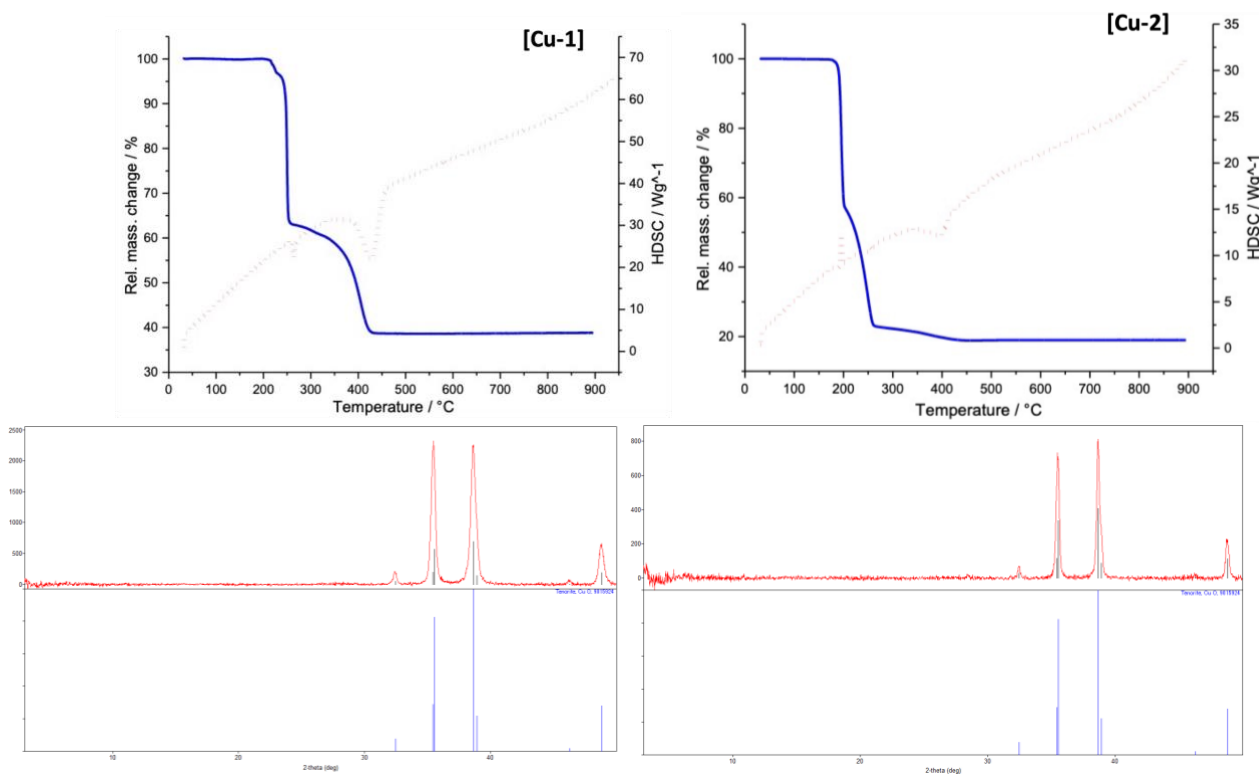

Fig. S6 Top: TGA and DSC of **1** and **2**. Bottom PXRD patterns of TGA residuals after heating to 800°C (in red) of left **1** and right **2** compared to the expected residual product CuO (in blue).

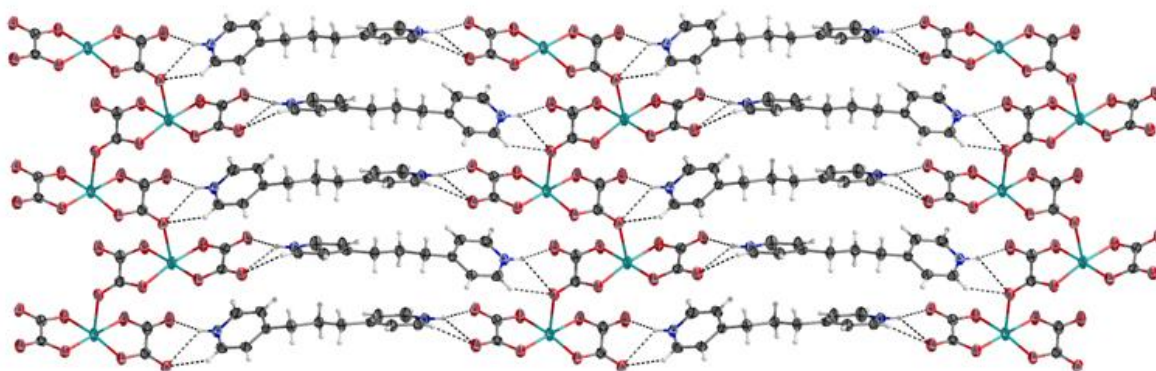

**Fig. S7.** The zigzag Cu(II) chain that runs along the crystallographic z-axis, Cu...Cu = 5.348 Å, in  $C_{13}H_{16}N_2[Cu(C_2O_4)_2]$  (**2**).

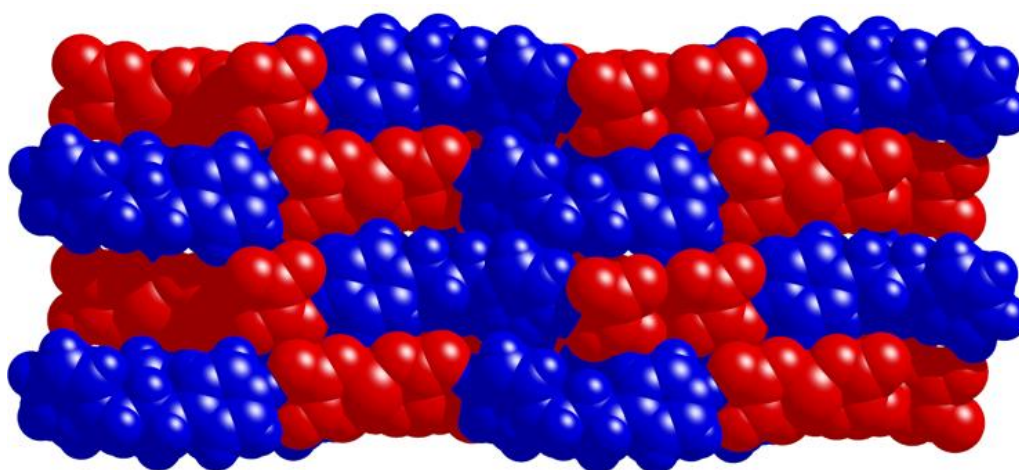

**Fig. S8.** The opposite charges (red for the pyridinium cation and blue for the complex anion) form a kind of chess board pattern in the xy-plane in  $C_{13}H_{16}N_2[Cu(C_2O_4)_2]$  (**2**) shown by a space filling model. The other way to think about the organisation in the xy-plane is weak hydrogen bonds.

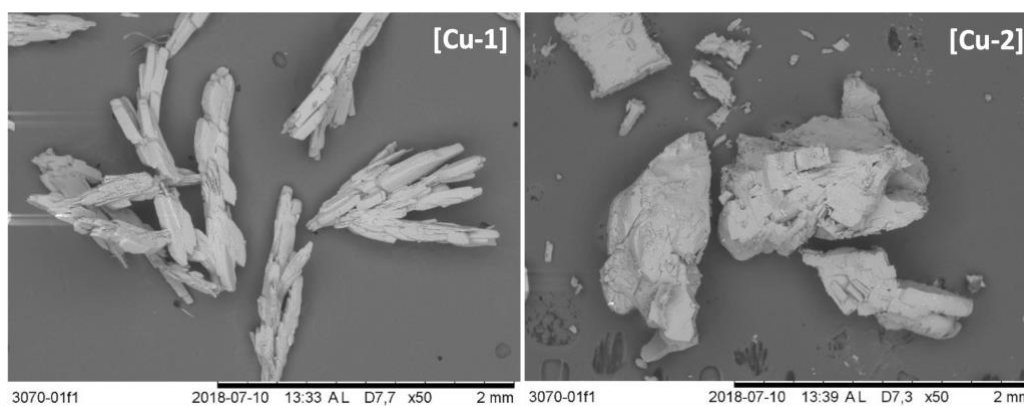

**Fig. S9.** Scanning electron microscopy of **1** and **2** (Cu-1 and Cu-2).
